# Supplementary material
Source: ML conference proceedings conference paper supplement (https://openaccess.thecvf.com/content/WACV2022/html/Abdelreheem_3DRefTransformer_Fine-Grained_Object_WACV_2022_paper.html)
Supplement: Supplementary file 1 [file Abdelreheem_3DRefTransformer_Fine-Grained_Object_WACV_2022_supplemental.pdf]

# 3DRefTransformer: Fine-Grained Object Identification in Real-World Scenes Using Natural Language

Ahmed Abdelreheem, Ujjwal Upadhyay, Ivan Skorokhodov,  
Rawan Al Yahya, Jun Chen, Mohamed Elhoseiny  
King Abdullah University of Science and Technology, Thuwal, Saudi Arabia

{ahmed.abdelreheem, ujjwal.upadhyay, ivan.skorokhodov, rawan.yahya, jun.chen, mohamed.elhoseiny}@kaust.edu.sa

This document include the following:

- Hyper-parameters used in our model
- Additional experiments
- Qualitative examples (successful/failure)

## 1. Hyper-parameters in 3D RefTransformer

We summarize the hyper-parameters used in our proposed model 3DRefTransformer in Table. 1. We use the same hyper-parameters for all transformer encoders in our model (object, language, and multimodal transformer encoders).

| Hyper-parameter                             | Value  |
|---------------------------------------------|--------|
| Base Learning Rate                          | 0.0005 |
| Batch Size                                  | 16     |
| Embedding dim $d$                           | 128    |
| Obj./Lang./MM transformer layers $L$        | 2      |
| Obj./Lang./MM transformer attention heads   | 8      |
| Obj./Lang./MM transformer FFN dim           | 512    |
| Obj./Lang./MM transformer FFN dropout       | 0.1    |
| Obj./Lang./MM transformer attention dropout | 0.3    |
| Optimizer                                   | Adam   |

Table 1. Hyper-parameters of 3DRefTransformer

## 2. Additional experiments

**Changing scale value in the scaled cosine distance.** Following suggestions for choosing the scale value in [2] and [1], we used a scale value of 3.3. Moreover, we attempted different scale values  $\eta$ , as discussed in Section. 3.5 of the main paper. In Table. 2, we report the overall performance of this experiment.

## 3. Additional qualitative examples

We present some qualitative examples of our proposed model 3DRefTransformer in Figure. 1 and Figure. 2.

## References

- [1] Sean Bell, C. Lawrence Zitnick, Kavita Bala, and Ross B. Girshick. Inside-outside net: Detecting objects in context with skip pooling and recurrent neural networks. *CoRR*, abs/1512.04143, 2015.
- [2] Ji Zhang, Yannis Kalantidis, Marcus Rohrbach, Manohar Paluri, Ahmed M. Elgammal, and Mohamed Elhoseiny. Large-scale visual relationship understanding. *CoRR*, abs/1804.10660, 2018.

|              | Accuracy                           |
|--------------|------------------------------------|
| $\eta = 1.0$ | 30.2% $\pm$ 0.4%                   |
| $\eta = 2.0$ | 35.2% $\pm$ 0.3%                   |
| $\eta = 3.3$ | <b>39.0% <math>\pm</math> 0.3%</b> |
| $\eta = 4.0$ | 38.3% $\pm$ 0.5%                   |
| $\eta = 5.0$ | 38.0% $\pm$ 0.4%                   |

Table 2. This table shows the performance of our model 3DRefTransformer trained using different scale values. Using scale value of 3.3 which is suggested by [2] and [1], gave the best performance.

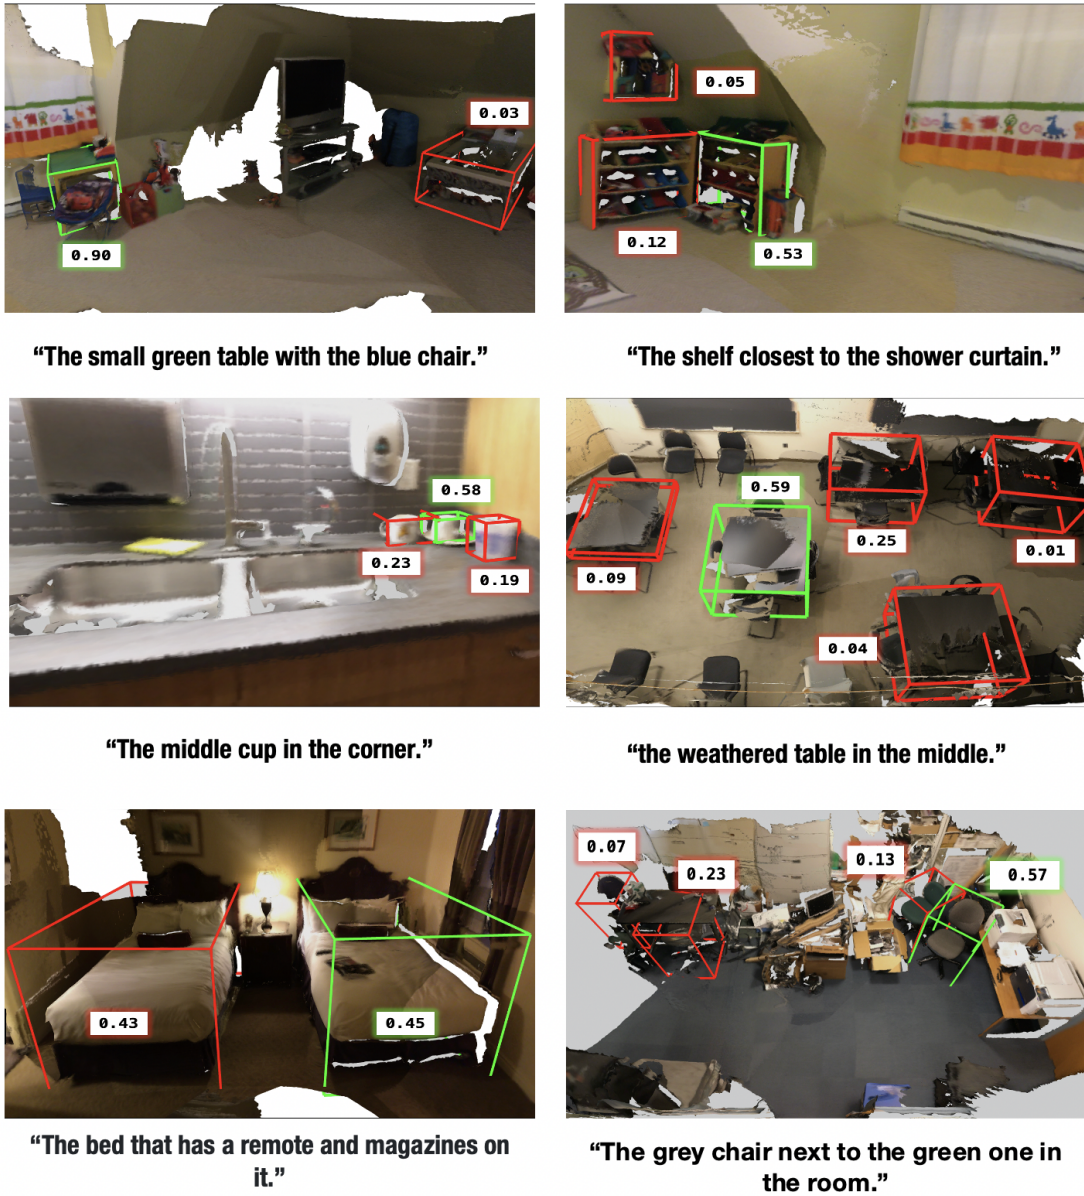

Figure 1. Successful examples using our most successful model.

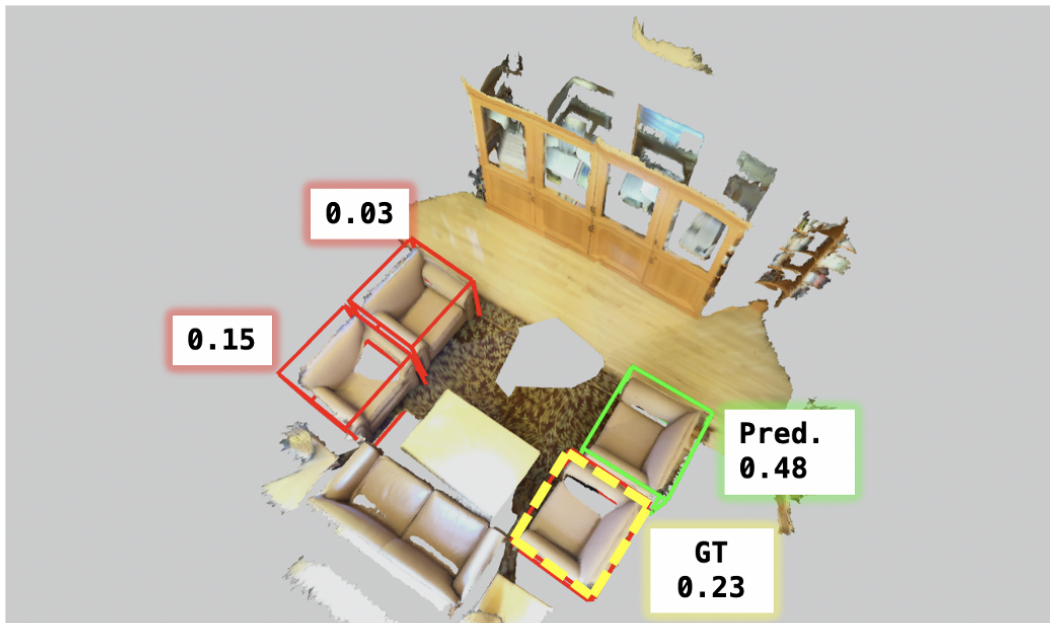

**"Walking towards the sofas, it's the left sofa furthest away from wooden cabinets."**

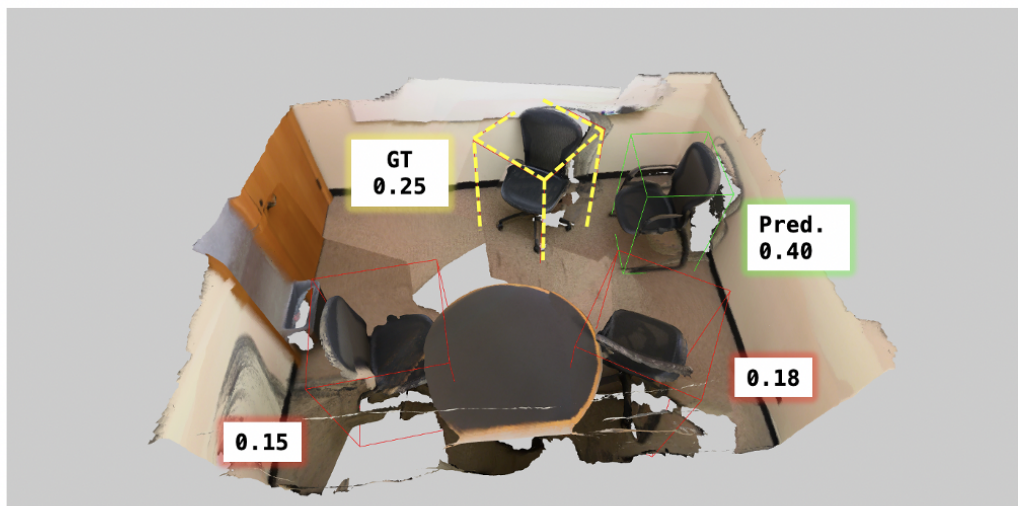

**"The chair closest to the whiteboard."**

Figure 2. Failure examples using our best performing model.
